# Supplementary material for: Arabidopsis PII Proteins Form Characteristic Foci in Chloroplasts Indicating Novel Properties in Protein Interaction and Degradation
Source: MDPI journal article supplement (doi:10.3390/ijms222312666), 2021-11-23
Supplement: s1 [file s1]

# Supplementary Materials: *Arabidopsis* PII Proteins Form Characteristic Foci in Chloroplasts Indicating Novel Properties in Protein Interaction and Degradation

Natalie Krieger, Kai-Florian Pastryk, Karl Forchhammer and Üner Kolukisaoglu

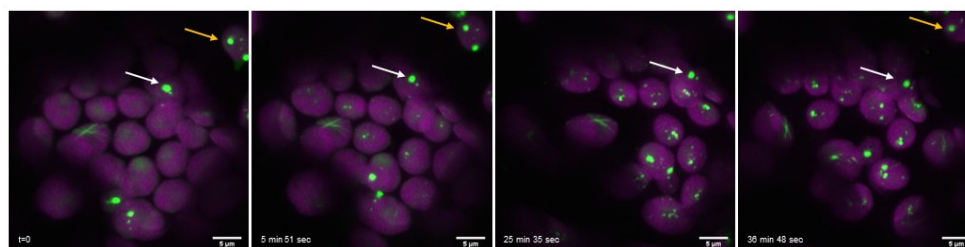

**Figure S1.** PII foci can be stable for more than 30 min. *AtPII*-GFP (green) under control of the *p35S* promotor was expressed in transiently transformed *N. benthamiana* and aggregates in PII foci in chloroplasts (magenta). Z-Stacks of time series were acquired 3 days after transient transformation of *N. benthamiana* leaves. Arrows indicate PII foci found over the whole recorded time. Scale bar: 5 µm.

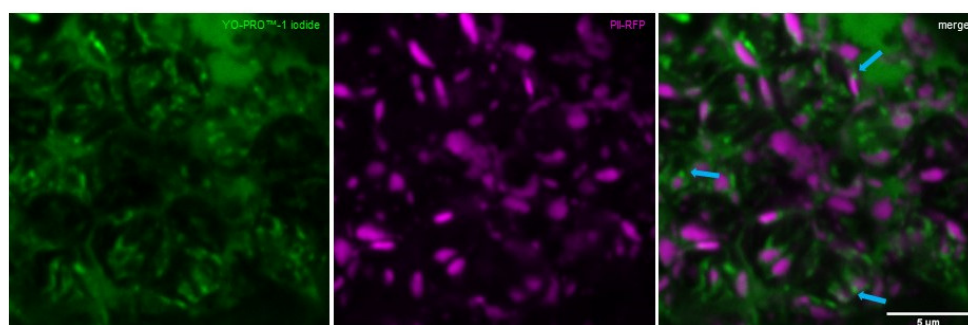

**Figure S2.** PII foci are not nucleoids. YO-PRO™-1 iodide stained nucleoids (green) in transiently transformed *N. benthamiana* leaves expressing *AtPII*-RFP (magenta) under the control of the *p35S* promotor. *N. benthamiana* leaf disks were fixed overnight 3 days after transient transformation followed by staining with YO-PRO™-1 iodide for 15 min. Blue arrows indicate examples of PII foci proximal to nucleoids. Scale bar: 5 µm.

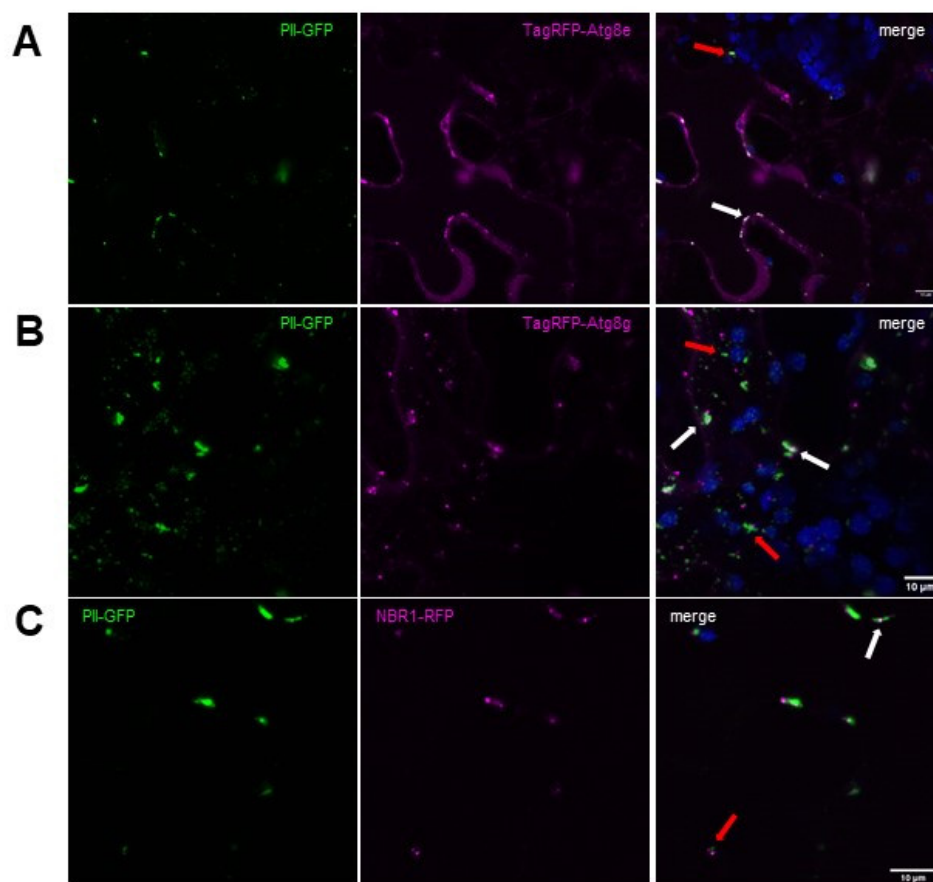

**Figure S3.** PII co-localizes partially with autophagy-related proteins. A)–C) TagRFP-Atg8e (A), TagRFP-Atg8g (B), and AtNBR1-RFP (C), which all localize in the cytoplasm of *N. benthamiana*, were co-expressed with AtPII-GFP (all genes under control of *p35S*). Images were taken 2 days after transient transformation in *N. benthamiana*. GFP (green), TagRFP and RFP (magenta), brightfield (grey), autofluorescence (blue). White arrows: co-localization; red arrows: no co-localization. Scale bar= 10  $\mu$ m.

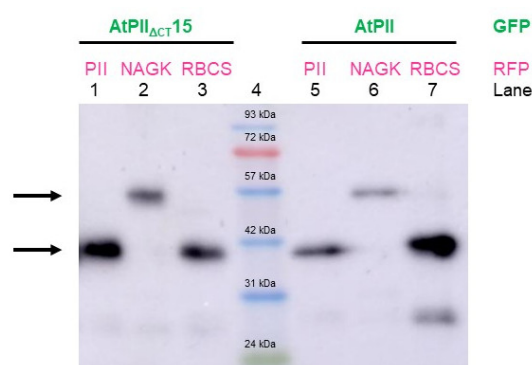

**Figure S4.** AtPII<sub>ACT15</sub>-GFP can also bind to its interactors. *N. benthamiana* leaves were transiently co-transformed with AtPII-GFP or AtPII<sub>ACT15</sub>-GFP together with AtPII-mCherry, AtNAGK-mCherry or AtRBCS3B-mCherry, respectively (all transformed constructs under the control of the *p35S* promoter). After 3 days of transient transformation GFP-fused proteins were immunopurified from protein extracts of transfected leaves. After SDS-PAGE of the Nano-Trap® eluates western blots were treated with anti-RFP antibodies to detect co-purified mCherry-fused proteins. In lanes 1–3 the eluates of extracts from co-expression of AtPII<sub>ACT15</sub>-GFP with AtPII-mCherry, AtNAGK-mCherry or AtRBCS3B-mCherry, respectively, have been loaded. In lanes 5–7 the same has been

done with extracts from co-expressions with *AtPII*-GFP. The upper arrow indicates the predicted size for *AtNAGK*-mCherry (56.6 kDa) and the lower arrow the predicted sizes for *AtPII*-mCherry and *AtRBCS3B*-mCherry (40.2 kDa and 40.9 kDa, respectively).

**Table S1.** Primers used for the construction of the different plant expression vectors.

|                       |                                                          |
|-----------------------|----------------------------------------------------------|
| AtGLB1-Start          | 5'-caccATGGCGGCGTCAATGACGAAAC-3'                         |
| AtGLB1-End            | 5'-AGACGGTGAAAGCATATCACCAG-3'                            |
| AtPII-C2A             | 5'-ACGCTCACCTGTCCTAACTC-3'                               |
| NK_proAtPIIstart      | 5'-caccTTTTGTTTCACCTTAACCAG-3'                           |
| NK_AtNAGKstart        | 5'-caccATGGCCACCGTCACATCCAATGCTTC-3'                     |
| NK_AtNAGKend          | 5'-TCCAGTAATCATAGTTCAGCTCCTTC-3'                         |
| NK_AtBCCP1start-2     | 5'-caccATGGCGTCTTCGTCGTTCTCAGTCAC-3'                     |
| NK-BCCP1end           | 5'-CGGTTGAACCACAAACAGAGGAGTGTC-3'                        |
| NK_RGCS1A-FP          | 5'-caccATGGCTTCCTCTATGCTCTCTCCG-3'                       |
| NK_RGCS1A-RP          | 5'-ACCGGTGAAGCTTGGTGGCTTGTAGG-3'                         |
| NK_attP2P3-PIIstart   | 5'-GGGGACAACCTTTGTATAATAAAGTTGTAATGGCGGCGTCAATGACG-3'    |
| NK_attP2P3-PIIend     | 5'-GGGGACCACTTTGTACAAGAAAGCTGGGTTAGACGGTGAAAGCATATC-3'   |
| NK_attP1P4-PIIstart   | 5'-GGGGACAAGTTTGTACAAAAAAGCAGGCTTAATGGCGGCGTCAATGACG-3'  |
| NK_attP1P4-PIIend     | 5'-GGGGACAACCTTTGTATAGAAAAGTTGGGTGAGACGGTGAAAGCATATC-3'  |
| NK_attP1P4-NAGKstart  | 5'-GGGGACAAGTTTGTACAAAAAAGCAGGCTTAATGGCCACCGTCACATCC-3'  |
| NK_attP1P4-NAGKend    | 5'-GGGGACAACCTTTGTATAGAAAAGTTGGGTGTCCAGTAATCATAGTTC-3'   |
| NK_attP1P4-BCCP1start | 5'-GGGGACAAGTTTGTACAAAAAAGCAGGCTTAATGGCGTCTTCGTCGTTTC-3' |
| NK_attP1P4-BCCP1end   | 5'-GGGGACAACCTTTGTATAGAAAAGTTGGGTGCGGTTGAACCACAAACAG-3'  |
| NK_RGCS1A-P1P4-FP     | 5'-GGGGACAAGTTTGTACAAAAAAGCAGGCTTAATGGCTTCCTCTATGCTC-3'  |
| NK_RGCS1A-P1P4-RP     | 5'-GGGGACAACCTTTGTATAGAAAAGTTGGGTGACCGGTGAAGCTTGGTGG-3'  |
| NK_attP1-FP-DXS       | 5'-GGGGACAAGTTTGTACAAAAAAGCAGGCTTAATGGCTTCCTCTGCATTT-3'  |
| NK_attP4-RP-DXS       | 5'-GGGGACAACCTTTGTATAGAAAAGTTGGGTGAAACAGAGCTTCCCTTGG-3'  |
| NK_attP1-FP-DXR       | 5'-GGGGACAAGTTTGTACAAAAAAGCAGGCTTAATGACATTAACTCACTA-3'   |
| NK_attP4-RP-DXR       | 5'-GGGGACAACCTTTGTATAGAAAAGTTGGGTGTGCATGAACTGGCCTAGC-3'  |

**Table S2.** Vectors used for the construction of the different plant expression vectors.

|                                   |                                                     |
|-----------------------------------|-----------------------------------------------------|
| pENTR™/D-TOPO®                    | Invitrogen Thermo Fisher Scientific (Carlsbad, USA) |
| pUBQ10-Dest                       | [1]                                                 |
| pMDC107                           | [2]                                                 |
| pH7FWG2,0-Dest                    | [3]                                                 |
| pB7RWG2,0-Dest                    | [3]                                                 |
| pFRETgc-2in1-CC                   | [4]                                                 |
| pBiFcT-2in1-CC                    | [5]                                                 |
| pDONR221-P1P4                     | Invitrogen Thermo Fisher Scientific (Carlsbad, USA) |
| pDONR221-P3P2                     | Invitrogen Thermo Fisher Scientific (Carlsbad, USA) |
| pENTR-L1-GentR-L4                 | [5]                                                 |
| pB7FWG2,0-DXS                     | Gift from Manuel Rodriguez-Concepcion; [6]          |
| pB7FWG2,0-DXR                     | Gift from Manuel Rodriguez-Concepcion; [6]          |
| CD3-999 pt-rk (Plastids, mCherry) | [7]                                                 |

---

## References:

1. Wanke, D.; Hohenstatt, M.L.; Dynowski, M.; Bloss, U.; Hecker, A.; Elgass, K.; Hummel, S.; Hahn, A.; Caesar, K.; Schleifenbaum, F.; Harter, K.; Berendzen, K.W. Alanine Zipper-Like Coiled-Coil Domains Are Necessary for Homotypic Dimerization of Plant GAGA-Factors in the Nucleus and Nucleolus. *PLoS ONE* **2011**, *6*, e16070.
2. Curtis, M.D.; Grossniklaus, U., A Gateway Cloning Vector Set for High-Throughput Functional Analysis of Genes in Planta. *Plant Physiol.* **2003**, *133*, 462–469.
3. Karimi, M.; Inzé, D.; Depicker, A. GATEWAY™ vectors for Agrobacterium-mediated plant transformation. *Trends Plant Sci.* **2002**, *7*, 193–195.
4. Hecker, A.; Wallmeroth, N.; Peter, S.; Blatt, M.R.; Harter, K.; Grefen, C. Binary 2in1 Vectors Improve in Planta (Co)localization and Dynamic Protein Interaction Studies. *Plant Physiol.* **2015**, *168*, 776–787.
5. Grefen, C.; Blatt, M.R. A 2in1 cloning system enables ratiometric bimolecular fluorescence complementation (rBiFC). *Biotechniques* **2012**, *53*, 311–314.
6. Perello, C.; Llamas, E.; Burlat, V.; Ortiz-Alcaide, M.; Phillips, M.A.; Pulido, P.; Rodriguez-Concepcion, M., Differential Subplastidial Localization and Turnover of Enzymes Involved in Isoprenoid Biosynthesis in Chloroplasts. *PLoS ONE* **2016**, *11*, e0150539.
7. Nelson, B.K.; Cai, X.; Nebenfuhr, A. A multicolored set of in vivo organelle markers for co-localization studies in Arabidopsis and other plants. *Plant J.* **2007**, *51*, 1126–1136.
